# Supplementary material for: Antimicrobial activity of nano-sized silver colloids stabilized by nitrogen-containing polymers: the key influence of the polymer capping
Source: Royal Society of Chemistry journal article supplement (doi:10.1039/c7ra13597a), 2018-01-01
Supplement: c7ra13597a1.pdf [file c7ra13597a1.pdf]

## Supplementary Information File

# **Antimicrobial Activity of Nano-Sized Silver Colloids Stabilized by Nitrogen-Containing Polymers: The Key Influence of the Polymer Capping**

*Carin C. S. Batista,<sup>a</sup> Lindomar J. C. Albuquerque,<sup>a</sup> Iris de Araujo,<sup>a</sup> Brunno L. Albuquerque,<sup>b</sup> Fernanda D. da Silva<sup>a</sup> and Fernando C. Giacomelli<sup>a,\*</sup>*

<sup>a</sup> Centro de Ciências Naturais e Humanas, Universidade Federal do ABC, Santo André, Brazil.

<sup>b</sup> Departamento de Química, Universidade Federal de Santa Catarina, Florianópolis, 88040-900, Brazil.

Corresponding Author: Fernando Carlos Giacomelli

e-mail. [fernando.giacomelli@ufabc.edu.br](mailto:fernando.giacomelli@ufabc.edu.br)

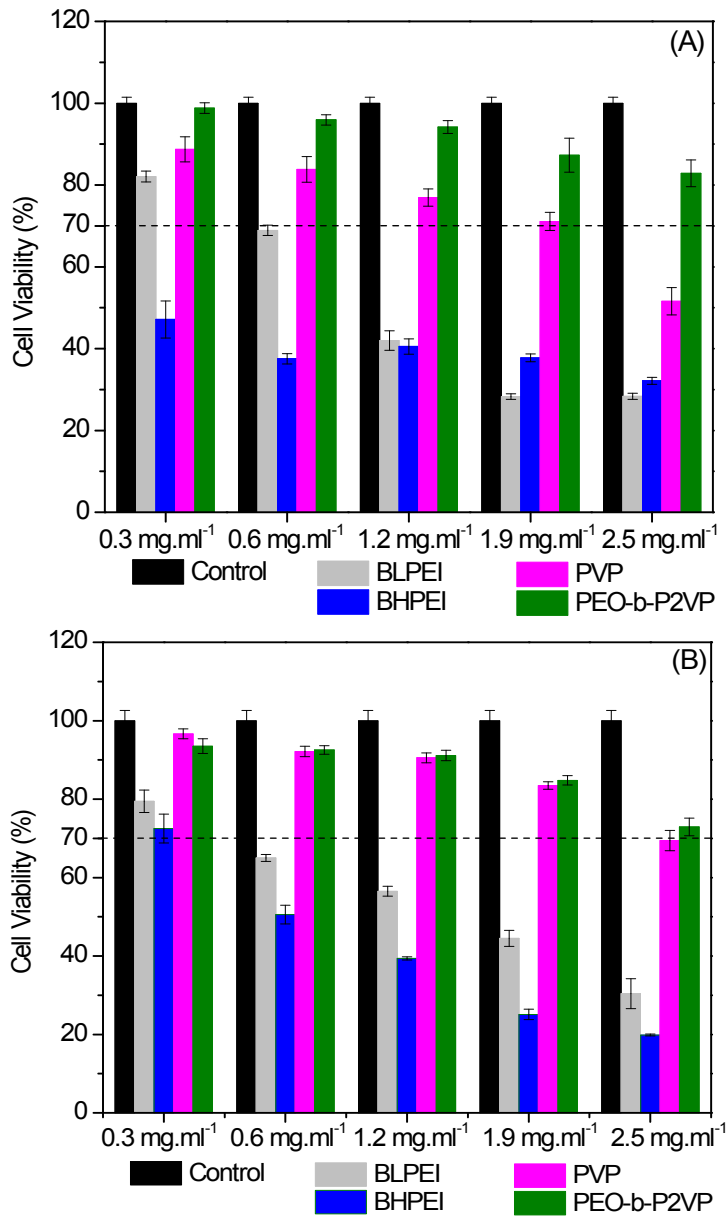

**Figure S1.** HeLa (A) and Telo-RF (B) cell viability after 24 h incubation time with amino-functionalized polymers at different concentrations. The results are expressed as mean  $\pm$  SD (n = 3) and the control refers to untreated cells.

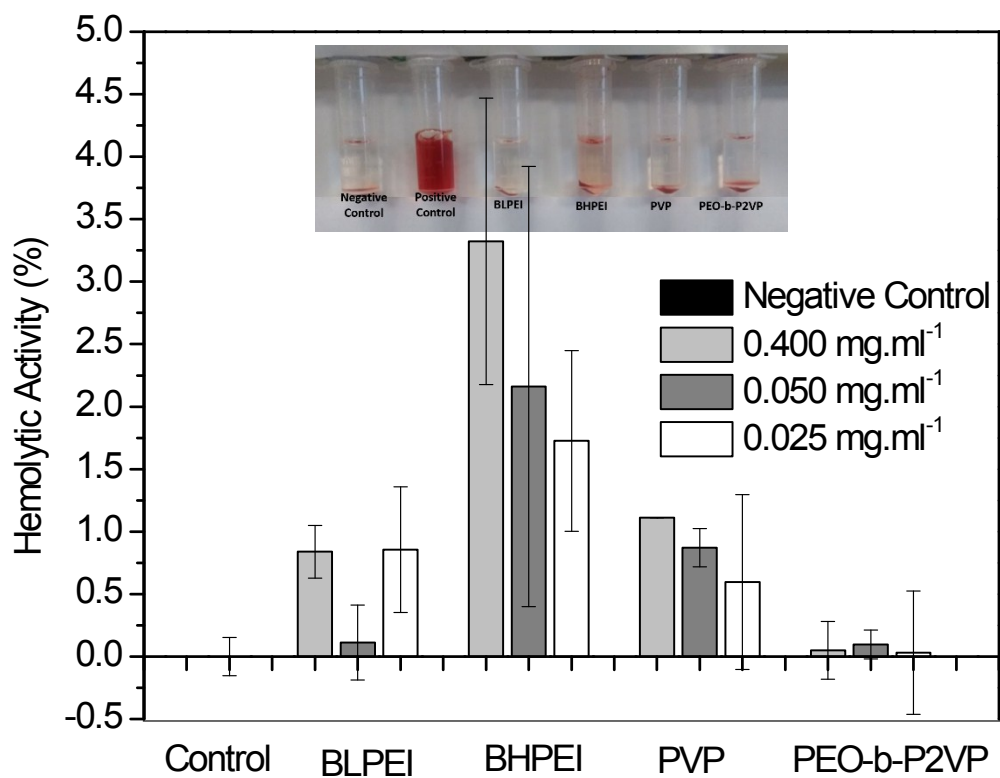

**Figure S2.** Hemolytic activity of amino-functionalized polymers at different concentrations according to the legend. The error bars refer to standard deviations and the inset portrays the visual appearance of the samples after the experimental procedures.

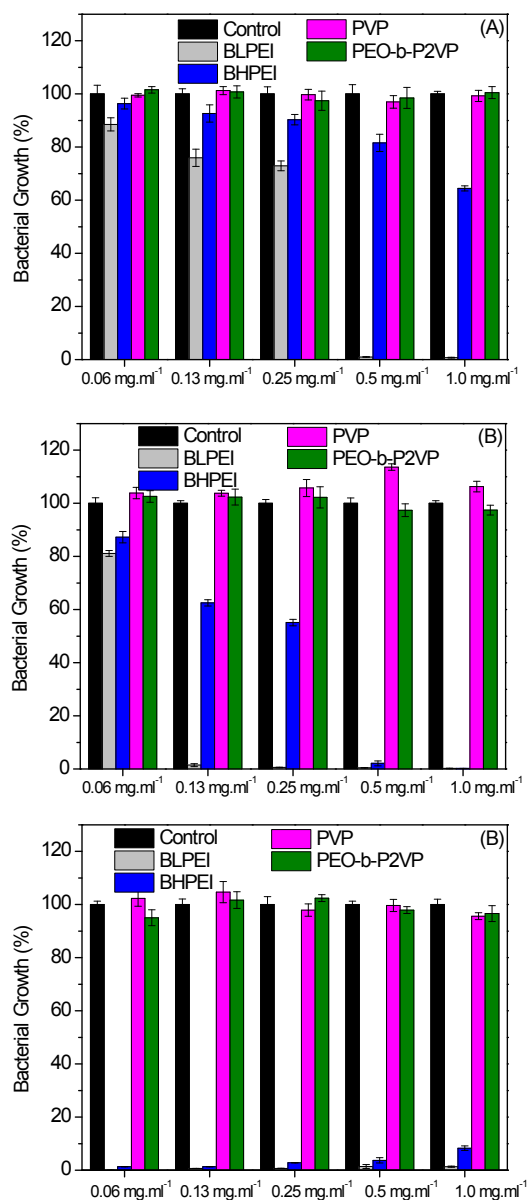

**Figure S3.** Antibacterial activity (% bacterial growth compared to untreated controls) of amino-functionalized polymers at different concentrations against strains of Gram-negative (*Enterobacter cloacae* - A; *Escherichia coli* - B) and Gram-positive (*Bacillus megaterium* - C) bacteria.

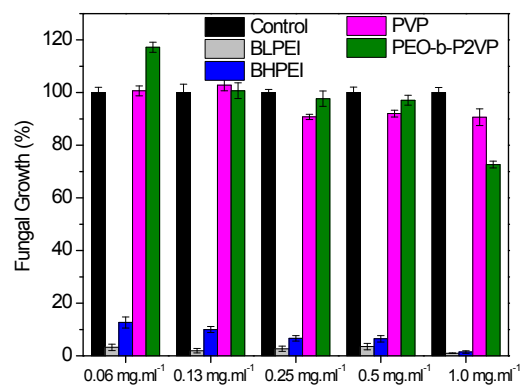

**Figure S4.** Antifungal activity (% fungal growth compared to untreated control) of amino-functionalized polymers at different concentrations against strain of the fungus *Candida albicans*.
